# Supplementary material for: Impaired phosphocreatine metabolism in white adipocytes promotes inflammation
Source: Springer Nature journal article supplement (doi:10.1038/s42255-022-00525-9), 2022-02-14
Supplement: MOESM1 [file 42255_2022_525_MOESM1_ESM.pdf › 42255_2022_525_MOESM1_ESM.pdf]

---

**Supplementary information**

---

**Impaired phosphocreatine metabolism in white adipocytes promotes inflammation**

---

In the format provided by the  
authors and unedited

| <b>Cohort 1 (NCT01727245)</b> |                         |                     |                |
|-------------------------------|-------------------------|---------------------|----------------|
| <b>Parameters</b>             | <b>Non-obese (n=13)</b> | <b>Obese (n=13)</b> | <b>p-value</b> |
| Age (years)                   | 48 (26-60)              | 45 (35-53)          | 0.89           |
| BMI (kg/m <sup>2</sup> )      | 22.5 (20.5-25.2)        | 37.9 (36.9-39.2)    | <0.0001        |
| Body fat (%)                  | 28.7 (23.5-31.9)        | 50.8 (49.4-53.4)    | <0.0001        |
| Fat cell volume (pL)          | 370 (239-505)           | 837 (674-1145)      | <0.0001        |
| P-glucose (mmol/L)            | 5 (4.8-5.8)             | 5.4 (4.9-5.8)       | 0.2            |
| P-insulin (mU/L)              | 5.54 (3.33-6.51)        | 13 (6.85-19.9)      | <0.0001        |
| P-cholesterol (mmol/L)        | 4.8 (4.1-5)             | 5 (4.1-5.7)         | 0.26           |
| P-triglycerides (mmol/L)      | 0.74 (0.63-1.1)         | 1.5 (1-2)           | 0.0002         |
| P-FFA (mmol/L)                | 0.63 (0.45-0.71)        | 0.74 (0.56-1.18)    | 0.07           |
| P-HDL (mmol/L)                | 1.8 (1.4-2)             | 1.2 (0.9-1.5)       | 0.0001         |

| <b>Cohort 2</b>          |                         |                     |                |
|--------------------------|-------------------------|---------------------|----------------|
| <b>Parameters</b>        | <b>Non-obese (n=26)</b> | <b>Obese (n=30)</b> | <b>p-value</b> |
| Age (years)              | 41.5 (35-48)            | 41.5 (38-45)        | 0.83           |
| BMI (kg/m <sup>2</sup> ) | 24.1 (23-25.1)          | 41.35 (36.9-43.4)   | <0.0001        |
| Body fat (%)             | 30.63 (27.63-32.38)     | 55.66 (47.88-59.06) | <0.0001        |
| Fat cell volume (pL)     | 472.5 (370-580)         | 925.5 (833-996)     | <0.0001        |
| P-glucose (mmol/L)       | 4.75 (4.6-5)            | 5.25 (5-5.5)        | 0.01           |
| P-insulin (mU/L)         | 4.35 (3.3-5.9)          | 14.6 (8.9-18.3)     | <0.0001        |
| P-triglycerides (mmol/L) | 0.78 (0.7-0.99)         | 1.45 (1.1-1.8)      | 0.0006         |
| P-FFA (mmol/L)           | 0.66 (0.56-0.78)        | 0.77 (0.7-0.89)     | 0.045          |

| <b>Cohort 3 (NCT01785134)</b> |                     |                            |                       |                |
|-------------------------------|---------------------|----------------------------|-----------------------|----------------|
| <b>Parameters</b>             | <b>Obese (n=15)</b> | <b>Post-surgery (n=15)</b> | <b>Control (n=15)</b> | <b>p-value</b> |
| Age (years)                   | 50 (41-53)          | 52 (43-54)                 | 48 (42-54)            | 0.82           |
| BMI (kg/m <sup>2</sup> )      | 40 (37.6-43.4)      | 25.5 (22.6-27.5)           | 25.3 (23.5-28.0)      | <0.0001        |
| Body fat (%)                  | 49.7 (47.5-53.2)    | 31 (27.0-34.7)             | 33.6 (26.6-40.4)      | <0.0001        |
| Fat cell volume (pL)          | 976 (769-1101)      | 322 (210-460)              | 504 (382-645)         | <0.0001        |
| P-glucose (mmol/L)            | 5.4 (5.2-5.9)       | 4.8 (4.4-5.0)              | 5.2 (5.0-5.4)         | 0.0004         |
| P-insulin (mU/L)              | 12.5 (8.9-14.2)     | 3.35 (2.5-5.6)             | 3.85 (3.0-5.7)        | <0.0001        |
| P-cholesterol (mmol/L)        | 5 (4.3-5.8)         | 4 (3.7-4.3)                | 4.6 (4.5-6.0)         | 0.023          |
| P-triglycerides (mmol/L)      | 1.5 (0.92-2.8)      | 0.99 (0.61-1.1)            | 0.7 (0.56-1.2)        | 0.0049         |
| P-FFA (mmol/L)                | 0.86 (0.69-0.95)    | 0.67 (0.40-1.2)            | 0.57 (0.48-0.63)      | 0.078          |
| P-HDL (mmol/L)                | 1.2 (1-1.3)         | 1.5 (1.3-1.9)              | 1.55 (1.4-2)          | 0.0035         |

| <b>Cohort 4 (NCT01727245)</b> |                         |                     |                |
|-------------------------------|-------------------------|---------------------|----------------|
| <b>Parameters</b>             | <b>Non-obese (n=17)</b> | <b>Obese (n=18)</b> | <b>p-value</b> |
| Age (years)                   | 53 (44-65)              | 50 (39-56)          | 0.18           |
| BMI (kg/m <sup>2</sup> )      | 25.85 (24.30-27.30)     | 38.10 (36.40-39.90) | <0.0001        |
| Body fat (%)                  | 28.60 (26.40-32.90)     | 43.15 (39.80-46.40) | <0.0001        |
| Fat cell volume (pL)          | 558 (469-629)           | 952 (717-1200)      | 0.003          |
| P-glucose (mmol/L)            | 5.6 (5.4-5.8)           | 5.8 (5.4-5.9)       | 0.19           |
| P-insulin (mU/L)              | 6.03 (3.74-7.99)        | 19.60 (12.2-38.9)   | 0.001          |
| P-cholesterol (mmol/L)        | 4.9 (4.2-5.6)           | 5 (4.1-5.6)         | 0.91           |
| P-triglycerides (mmol/L)      | 0.78 (0.64-1.5)         | 1.75 (1.1-2.2)      | 0.001          |
| P-FFA (mmol/L)                | 0.46 (0.35-0.58)        | 0.57 (0.42-0.65)    | 0.19           |
| P-HDL (mmol/L)                | 1.2 (0.9-1.5)           | 1 (0.8-1.2)         | 0.06           |

**Supplementary Table 1:** Clinical and biological parameters for subjects included in the four cohorts of the study. Data are expressed in median (95% CI). NCT numbers in [clinicaltrials.gov](https://clinicaltrials.gov) are provided. P-values were determined using Student's t-test for cohort 1, 2 and 4 and one-way ANOVA for cohort 3.

**Supplementary Table 2. List of reagents.**

| <b>Reagents and Antibodies</b>             | <b>SOURCE</b>        | <b>IDENTIFIER</b> |
|--------------------------------------------|----------------------|-------------------|
| Lamin A/C                                  | Cell Signaling Tech. | Cat#4777          |
| Tubulin                                    | Cell Signaling Tech. | Cat#2144          |
| GAPDH (14C10)                              | Cell Signaling Tech. | Cat#2118          |
| TOM20 (for western blot)                   | Cell Signaling Tech. | Cat#42406         |
| TOM20 (for immunofluorescence)             | Proteintech          | Cat#66777-1-Ig    |
| AMPK $\alpha$                              | Cell Signaling Tech. | Cat#2532          |
| Phospho-AMPK $\alpha$                      | Cell Signaling Tech. | Cat#2535          |
| Creatine kinase B (for immunofluorescence) | Abcam                | Cat#AB151579      |
| Creatine kinase B (for western blot)       | Abcam                | Cat#AB108388      |
| CKMT2                                      | Abcam                | Cat#AB55963       |
| Total OXPHOS                               | Abcam                | Cat#AB110413      |
| F4/80-Alexa Fluor 488                      | Abcam                | Cat#AB204266-100  |
| Goat $\alpha$ -Rabbit IgG (H+L)            | Thermo Fisher        | Cat#R-6394        |
| LCA, Rhodamine                             | Vector lab           | Cat#RL-1042       |
| Rabbit IgG-HRP                             | Sigma-Aldrich        | Cat#A9169         |
| Mouse IgG-HRP                              | Sigma-Aldrich        | Cat#5278          |
| DPP4/CD26                                  | Fisher Scientific    | Cat#16847663      |
| Actin                                      | Sigma-Aldrich        | Cat#A2066         |
| Goat serum                                 | Sigma-Aldrich        | Cat#G9023         |

| <b>Critical Commercial Assays</b>                               |               |                 |
|-----------------------------------------------------------------|---------------|-----------------|
| Seahorse XF Glycolysis Stress Test                              | Agilent       | Cat#103020-100  |
| Seahorse XF Mito Stress Test                                    | Agilent       | Cat#103015-100  |
| Seahorse XFp Mito Fuel Flex Test                                | Agilent       | Cat#103070-100  |
| iScript cDNA Synthesis kit                                      | Bio-Rad       | Cat#170-8891    |
| Insulin ELISA Kit                                               | Crystal Chem  | Cat#90080       |
| Pierce BCA Protein Assay Kit                                    | ThermoFisher  | Cat#23227       |
| MCP-1/CCL2 Human ELISA Kit                                      | ThermoFisher  | Cat#88-7399-22  |
| Human Total Adiponectin/Acrp30 Quantikine ELISA                 | R & D systems | Cat#DRP300      |
| Triglyceride quantification assay-Colorimetric/fluorometric kit | Sigma-Aldrich | Cat# MAK266-1KT |
| ATP/ADP ratio assay                                             | Sigma-Aldrich | Cat#MAK135-1KT  |
| Creatine kinase activity assay                                  | Abnova        | Cat#KA1665      |
| MitoTracker™ Deep Red FM                                        | ThermoFisher  | Cat#M22426      |

| <b>Gene silencers</b>                    |           |                      |
|------------------------------------------|-----------|----------------------|
| ON-TARGETplus Non-targeting Pool         | Dharmacon | Cat# D-001810-01-20  |
| ON-TARGETplus siRNA CKB - Human          | Dharmacon | Cat#L-006706-00-0005 |
| ON-TARGETplus siRNA SLC6A8 - Human       | Dharmacon | Cat#L-007608-00-0005 |
| ON-TARGETplus siRNA CKMT2 - Human        | Dharmacon | Cat#L-006709-00-0005 |
| ON-TARGETplus siRNA PRKAA1 - Human       | Dharmacon | Cat#L-005027-00-0005 |
| ON-TARGETplus siRNA PRKAG1 - Human       | Dharmacon | Cat#L-009056-00-0005 |
| AllStars Negative Control siRNA (5 nmol) | Qiagen    | Cat#1027280          |
| Hs_CKB_7 FlexiTube siRNA                 | Qiagen    | Cat#1027417          |

| Chemicals, Peptides, and Recombinant Proteins         |                    |                 |
|-------------------------------------------------------|--------------------|-----------------|
| TaqMan Master Mix                                     | Applied Biosystems | Cat#4318157     |
| SYBR-green Master Mix                                 | Bio-Rad            | Cat#1708884     |
| Amersham ECL Prime Blocking Reagent                   | GE Healthcare      | Cat#RPN418      |
| Amersham ECL Prime Western Blotting Detection Reagent | GE Healthcare      | Cat#RPN2232     |
| DTT                                                   | Sigma-Aldrich      | Cat#10197777001 |
| Optiphas Hisafe 3                                     | Perkin Eimer       | Cat#1200.437    |
| QIAzol lysis reagent                                  | Qiagen             | Cat#79306       |
| Bodipy 493/503                                        | ThermoFisher       | Cat# D3922      |
| Hoechst                                               | ThermoFisher       | Cat#34580       |
| CyQUANT                                               | ThermoFisher       | Cat#C7026       |
| 2-deoxy-D- [1-H <sup>3</sup> ]-glucose                | Perkin Eimer       | Cat#NET328250UC |
| Glucose Solution                                      | ThermoFisher       | Cat#A2494001    |
| RIPA buffer                                           | ThermoFisher       | Cat#89901       |
| Collagenase                                           | Sigma-Aldrich      | Cat#C6885       |
| 2-deoxy-D-glucose                                     | Sigma-Aldrich      | Cat#D6134-1G    |
| FGF2 human                                            | Sigma-Aldrich      | Cat#F0291       |
| Insulin (liquid, ready to use, 10mg/ml, 5ml)          | Sigma-Aldrich      | Cat#19278       |
| T3                                                    | Sigma-Aldrich      | Cat#T6397       |
| Transferrin                                           | Sigma-Aldrich      | Cat#T8158       |
| IBMX (3-Isobutyl-1-methylxanthin)                     | Sigma-Aldrich      | Cat#15879       |
| Rosiglitazone (100 mg)                                | Cayman Chemicals   | Cat#71740       |
| Dexamethasone                                         | Sigma-Aldrich      | Cat#D1756       |
| 0.5% Trypsin/EDTA (10X)                               | Invitrogen (GIBCO) | Cat#15400-054   |
| Penicilline G 10000U/ml/Streptomycine 10000µg/ml      | Invitrogen (GIBCO) | Cat#15140-122   |
| Hepes 1M                                              | Invitrogen (GIBCO) | Cat#15630-056   |
| Ham's F-12 Nutrient Mix                               | Invitrogen (GIBCO) | Cat#21765-037   |
| DMEM, low glucose, pyruvate (+ glutamine)             | Invitrogen (GIBCO) | Cat#31885-023   |
| Pierce™ 16% Formaldehyde (w/v), Methanol-free         | ThermoFisher       | Cat#28906       |
| 4x Laemmli Sample Buffer                              | BioRad             | Cat#1610747     |
| PF-739                                                | Aobious            | Cat#AOB33584    |
| Creatine anhydrous                                    | Sigma-Aldrich      | Cat#C0780-50G   |
| Creatine phosphate                                    | Millipore Sigma    | Cat#10621714001 |
| UK-5099                                               | Sigma-Aldrich      | Cat#PZ0160-5MG  |
| Etomoxir sodium salt hydrate                          | Sigma-Aldrich      | Cat#E1905-5MG   |
| BPTES                                                 | Sigma-Aldrich      | Cat#SML0601-5MG |
| Bongkreikic acid                                      | Cayman Chemicals   | Cat#19079       |
| Oligomycin                                            | Agilent            | Cat#103015-100  |
| AICAR                                                 | Sigma-Aldrich      | Cat#A9978-25MG  |
| Metformin                                             | Sigma-Aldrich      | Cat# PHR1084    |
| Seahorse Glutamine solution                           | Agilent            | Cat#103579-100  |
| Seahorse glucose solution                             | Agilent            | Cat#103577-100  |
| Seahorse pyruvate solution                            | Agilent            | Cat#103578-100  |

| Oligonucleotides                |                    |               |
|---------------------------------|--------------------|---------------|
| TaqMan probe human <i>LRP10</i> | Applied Biosystems | Hs00204094_m1 |
| TaqMan probe human <i>PPIA</i>  | Applied Biosystems | Hs04194521_s1 |
| TaqMan probe human <i>CCL2</i>  | Applied Biosystems | Hs00234140_m1 |
| TaqMan probe human <i>PLIN1</i> | Applied Biosystems | Hs00193510_m1 |
| TaqMan probe human <i>PPARG</i> | Applied Biosystems | Hs01115513_m1 |

|                                       |                    |                                                                |
|---------------------------------------|--------------------|----------------------------------------------------------------|
| TaqMan probe human <i>FABP4</i>       | Applied Biosystems | Hs01086177_m1                                                  |
| TaqMan probe human <i>CKB</i>         | Applied Biosystems | Hs00176484_m1                                                  |
| TaqMan probe human <i>SLC6A8</i>      | Applied Biosystems | Hs00940515_m1                                                  |
| TaqMan probe human <i>PRKAA1</i>      | Applied Biosystems | Hs01562308_m1                                                  |
| TaqMan probe human <i>PRKAG1</i>      | Applied Biosystems | Hs01091629_g1                                                  |
| TaqMan probe human <i>UCP1</i>        | Applied Biosystems | Hs00222453_m1                                                  |
| TaqMan probe human <i>PPARGC1A</i>    | Applied Biosystems | Hs00173304_m1                                                  |
| TaqMan probe murine <i>Ccl2</i>       | Applied Biosystems | Mm00441242_m1                                                  |
| TaqMan probe murine <i>ActB</i>       | Applied Biosystems | Mm00607939_s1                                                  |
| TaqMan probe murine <i>Gapdh</i>      | Applied Biosystems | Mm99999915_g1                                                  |
| TaqMan probe murine <i>Ckmt1</i>      | Applied Biosystems | Mm00438221_m1                                                  |
| TaqMan probe murine <i>Ckmt2</i>      | Applied Biosystems | Mm01285553_m1                                                  |
| SYBR green probe murine <i>Adgre1</i> | Sigma-Aldrich      | Fw:TGACTCACCTT<br>GTGGTCCTAA;<br>Rv:CTTCCCAGAAT<br>CCAGTCTTTCC |
| SYBR green probe murine <i>Cd68</i>   | Sigma-Aldrich      | Fw:TGTCTGATCTT<br>GCTAGGACCG;<br>Rv:GAGAGTAACGG<br>CCTTTTGTGA  |
| SYBR green probe murine <i>Ckb</i>    | Sigma-Aldrich      | Fw:AAGTTCTCGGA<br>GGTGCTCAA<br>Rv:CCGTTGCTCCAT<br>CTCAATG      |
